# Supplementary material
Source: PubMed Central journal article supplement (PMC3387709)
Supplement: supp_pp.112.198432_198432Supplemental_Figures.pdf [file supp_pp.112.198432_198432Supplemental_Figures.pdf]

# Supplemental Figure S1

Avila et al.

```
AtSnRK1.1 MFKRVDDEFNLVSSTIDHRIFKSRMDGSG-TGSRSGVESILPNYKLGRTLIGIGSFGRVKIA 59
S1SnRK1 -----MDGTA-VQGTSSVDSFLRNYKLGKTLGIGSFQKVKIA 36
AtSnRK1.2 -----MDHSSNRFNGNGVESILPNYKLGKTLGIGSFQKVKIA 37
AtSnRK1.3 -----MDGSS-EKTTNKLVSILPNYRIGKTLGHGSAKVKLA 36
AtSnRK2.1 -----MDKYDVVKDLGAGNFGVARLL 21
AtSnRK2.2 -----MDPATNSPIMPIDLPIMHSDRYDFVKDIGSGNFGVARLM 40
AtSnRK2.3 -----MDRAP-VTTGPLDMPIMHSDRYDFVKDIGSGNFGVARLM 39
AtSnRK3.1 -----MEK-----KGSVLMRLRYEVGKFLGQGTFAKVYHA 29
AtSnRK3.2 -----MEN-----KPSVLTERYEVGRLGQGTFAKVYFG 29
AtSnRK3.3 -----MESPYPKSPEKITGTVLLGKYELGRRLGSGSFAKVHVA 38
.* . : : * * . . .

AtSnRK1.1 EHALTGHKVAIKILNRRKIKNMEMEKKVRRREIKILR-LFMHPHIIRLYEVIETPTDIYLV 118
S1SnRK1 EHTLTGHKVAVKILNRRKIRNMDMEKKVRRREIKILR-LFMHPHIIRLYEVIETPSDIYVV 95
AtSnRK1.2 EHVVTGHKVAIKILNRRKIKNMEMEKKVRRREIKILR-LFMHPHIIRQYEVIEETSDIYVV 96
AtSnRK1.3 LHVATGHKVAIKILNRSKIKNMGIEIKVQREIKILR-FLMHPHIIRQYEVIEETPNDIYVV 95
AtSnRK2.1 RHKDTKELVAMKYIER----GRKIDENVAREIINHR-SLKHPNIIRFKEVILTPHLAIV 76
AtSnRK2.2 TDRVTKELVAVKYIER----GEKIDENVQREIINHR-SLRHPNIVRFKEVILTPSHLAIV 95
AtSnRK2.3 RDKLTKELVAVKYIER----GDKIDENVQREIINHR-SLRHPNIVRFKEVILTPHLAII 94
AtSnRK3.1 RHLKTGDSVAIKVIDKERILKVGMTQIKREISAMR-LLRHPNIVELHEVMATKSKIYFV 88
AtSnRK3.2 RSNHTNESVAIKMIDKDKVMRVGLSQQIKREISVMR-IAKHPNVVELYEVMATKSRIFV 88
AtSnRK3.3 RSISTGELVAIKIIDKQKTIDSGMEPRIIREIEAMRRLHNHPNVLKIEVMATKSKIYLV 98
* . **:* :: : . : *** * **::: **:* . : . :

AtSnRK1.1 MEYVNSGELFDYIVEKGRLOEDEARNFFQOIISGVEYCHRMVVRDLKPENLLLDKSKCN 178
S1SnRK1 MEYVKSSELFDYIVEKGRLOEDEARNFFQOIISGVEYCHRMVVRDLKPENLLLDKSKWN 155
AtSnRK1.2 MEYVKSSELFDYIVEKGRLOEDEARNFFQOIISGVEYCHRMVVRDLKPENLLLDKSRCN 156
AtSnRK1.3 MEYVKSSELFDYIVEKGRLOEDEARNFFQOIISGVEYCHRMVVRDLKPENLLLDKQCN 155
AtSnRK2.1 MEYASGGELFDRICTAGRFSEAEARYFFQQLICGVYCHSLQICHRDLKLENTLLDGSPA 136
AtSnRK2.2 MEYASGGELYERICNAGRFSEAEARYFFQQLISGVSYCHAMQICHRDLKLENTLLDGSPA 155
AtSnRK2.3 MEYASGGELYERICNAGRFSEAEARYFFQQLISGVSYCHSMQICHRDLKLENTLLDGSPA 154
AtSnRK3.1 MEHVKGSELFNKVST-GKLRDVARVYFQQLVRAVDVFCVSRGVCHRDLKPENLLLDDEHGN 147
AtSnRK3.2 IEYCKGSELFNKVAK-GKLRDVARVYFQQLISAVDVFCHSRGVYHRDIKPENLLLDNDN 147
AtSnRK3.3 VEYASGGELFTKLIRFGRLNESAAARYFQQLASALSFCVHRDGIHRDVKPQNLKQGN 158
*: .***: : **: * * * *: .:*** : **:* : * **

AtSnRK1.1 --VKIADFGLSNIM---RDGHFLKTSVCGSPNYAAPEVISGKLYAGPEVDVWSCGVILYAL 233
S1SnRK1 --VKIADFGLSNIM---RDGHFLKTSVCGSPNYAAPEVISGKLYAGPEVDVWSCGVILYAL 210
AtSnRK1.2 --IKIADFGLSNVM---RDGHFLKTSVCGSPNYAAPEVISGKLYAGPEVDVWSCGVILYAL 211
AtSnRK1.3 --IKIVDFGLSNVM---HDGHFLKTSVCGSPNYAAPEVISGKPYG-PDVDIWSGVILYAL 209
AtSnRK2.1 PLLKICDFGYSKSS---ILHSRPKSTVGTTPAYIAPEVLSRREYDGGKADVWSCGVTLVYM 193
AtSnRK2.2 PRLKICDFGYSKSS---VLHSQPKSTVGTTPAYIAPEILLRQYDGGKADVWSCGVTLVYM 212
AtSnRK2.3 PRLKICDFGYSKSS---VLHSQPKSTVGTTPAYIAPEVLLRQYDGGKADVWSCGVTLVYM 211
AtSnRK3.1 --LKISDFGLSALSRRQDGLLHTTCGTPAYVAPEVISRNGYDGGKADVWSCGVILFVL 205
AtSnRK3.2 --LKVSDFGLSALADCKRQDGLLHTTCGTPAYVAPEVINRKGYEGTKADIWSCGVVLFVL 205
AtSnRK3.3 --LKVSDFGLSALPEHRSNGLLHTTACGTPAYVAPEVIAQRGYDGGKADAWSCGVVLFVL 216
*: *** * : : * * * * : . * . * * * * * : :

AtSnRK1.1 LCGTLPFDDENIPNLFKKIKGGIYTLPS-----HLSPGARDLIPRMLVVDPMKRVTIPE 287
S1SnRK1 LCGTLPFDDENIPNLFKKIKGGIYTLPS-----HLSAGARDLIPRMLIVDPMKRMTIPE 264
AtSnRK1.2 LCGTLPFDDENIPNLFKKIKGGIYTLPS-----HLSSEARDLIPRMLIVDPVKRITPE 265
AtSnRK1.3 LCGTLPFDDENIPNVFEKIKRGMYYTLPN-----HLSHFARDLIPRMLMVDPTMRISITE 263
AtSnRK2.1 LVGAYPFEDPNDPKNFRKTIQRIMAVQYKIPDYVHISQECKHLLSRIFVTNSAKRITLKE 253
AtSnRK2.2 LVGAYPFEDPQEPDRYKTIQRILSVTYSIPEDLHLSPECRHLISRIFVADPATRITPE 272
AtSnRK2.3 LVGAYPFEDPEPRDYKTIQRILSVKYSIPDDIRISPECCHLISRIFVADPATRISIPE 271
AtSnRK3.1 LAGYLPFRDNLMELYKKGKAEVKFPN-----WLAGAKRLLKRILDPNPTRVSTEK 259
AtSnRK3.2 LAGYLPFHDTNLMEMRYKIKGADFKCPS-----WFAPEVKRLLCKMLDPNHETRITIAK 259
AtSnRK3.3 LAGYVPFDDANIVAMYRKIHKRDYRFPS-----WISKPARSIYKLLDPNPETRMSIEA 270
* * * * : : * : : : : * :

AtSnRK1.1 IRQHPWFQAHLPYLAVPPDTPVQQAkki-----DEEILQEVINMGFDRNHL 334
S1SnRK1 IRLHPWFQAHLPYLAVPPDTPVQQAkki-----DEEILQEVVKGDFDRNHL 311
AtSnRK1.2 IRQHRWFQTHLPYLAVSPDTPVEQAkki-----NEEIVQEVVNMGFDRNQV 312
AtSnRK1.3 IRQHPWFNNHLPYLSIPPLDTIDQAkki-----EEEIIONVVNIGFDRNHV 310
AtSnRK2.1 IKNHPWYLKLNLPKELLESA-QAAYYKRDT-----SFSLOSVEDIMKIVGEAR 299
AtSnRK2.2 ITSDKWFLKLNLPGLMDEN-RMGSQFQEP-----EQPMQSLDTIMQIISEAT 318
AtSnRK2.3 IKTHSWFLKLNLPADLMNES-NTGSQFQEP-----EQPMQSLDTIMQIISEAT 317
AtSnRK3.1 IMKSSWFRKGLQEEVK--ESVEETEVD-----EAEGNASAEK----EKKRCINLNAFEI 309
AtSnRK3.2 IKESSWFRKGLHLKQKKMEKMEKQOVREATNPMEAGGSGQENGENHEPPRLATLNAFDI 319
AtSnRK3.3 VMGTVWFQKSLEISEFQSSVFEldrFLEK-----EAKSSNAITAFDL 312
: * : * . :
```

# Supplemental Figure S1 contd.

Avila et al.

|                |                                                                     |            |
|----------------|---------------------------------------------------------------------|------------|
| AtSnRK1.1      | IESLRNRTQNDGTVTYYLILDNRFR--ASSGYLGAEFQETMEG--TPRMHPAESVASPVSH       | 391        |
| <b>SISnRK1</b> | <b>TESLRNRVQNEGTVAAYLLLDNRHR--VSTGYLGAEFQESMEYGYNRINSNETAASPVGQ</b> | <b>369</b> |
| AtSnRK1.2      | LESLRNRTQNDATVTYYLILDNRFR--VPSGYLESEFQETTWF-----                    | 353        |
| AtSnRK1.3      | VDSLARIQNEATVAYHLILDNRNQNVSVPNDPFQSKFKEISDGIFNSTLPVQNITSHVGH        | 370        |
| AtSnRK2.1      | NPAPSTSAVKSSGSGADEEEEEEDVEAEVEEEEEDEDEYEKHKVKEAQSCQESDKA-----       | 353        |
| AtSnRK2.2      | IPTVRNRCLDDFMADN-LDLDDDMDDFDSESEIDVDSSGEIVYAL-----                  | 362        |
| AtSnRK2.3      | IPAVRNRCLDDFMTDN-LDLDDDMDDFDSESEIDIDSSGEIVYAL-----                  | 361        |
| AtSnRK3.1      | ISLSTGFDSLGLFEKGEKEEMRFTSNREASEITEKLVEIGKDLKMKVRKK-EHEWRVKM         | 368        |
| AtSnRK3.2      | IALSTGFGLAGLFGDVYDKRESRFASQKPASEIISKLVKAKCLKLRKQAGLFLKLER           | 379        |
| AtSnRK3.3      | ISLSSGLDLGLFER-RKRKEKRFTARVSAERVVEKAGMIGEKLGRFVEKK--EETKVVG         | 369        |
| :              |                                                                     |            |
| AtSnRK1.1      | RLPGLMEYQGVGLRSQYPVERKWALGLQSRAPREIMTEVLKALQDLNVCWKKIGHYNMK         | 451        |
| <b>SISnRK1</b> | <b>RFPGIMDYQQAGAR-QFPIERKWALGLQSRAPREIMTEVLKALQELNVCWKKIGQYNMK</b>  | <b>428</b> |
| AtSnRK1.2      | -----QSYAHT-----                                                    | 359        |
| AtSnRK1.3      | SFSALYGLKSNVKD-----DKTWTGLGLQSQGSPYDIMTEIFKALQNLKICWKKIGLYNIK       | 425        |
| AtSnRK2.1      | -----                                                               |            |
| AtSnRK2.2      | -----                                                               |            |
| AtSnRK2.3      | -----                                                               |            |
| AtSnRK3.1      | SAEAT----VVEAEVFEIAPSYHMVVLKKSQGDTAEYKRVMK--ESIRPALIDFVLAWH-        | 421        |
| AtSnRK3.2      | VKEGKNGILTMDAEIFQVTPTFHLVEVKKCNQDTEYQKLV--EDLRPALADIVVWVQG          | 437        |
| AtSnRK3.3      | LGKGR---TAVVVEVVEFAEGLVVADVKKVVVEGEEEEEEVESHWSELIVELEEIVLSWHN       | 426        |
| :              |                                                                     |            |
| AtSnRK1.1      | CRWVPNSS--ADGMLSNSMHDNNYFGDESSIIENEAAVKSPNVVKFEIQLYKTRDDKYLL        | 509        |
| <b>SISnRK1</b> | <b>CRWVPSLPGHHEGMVNSMHGNQFFGDDSSIIENDGATKLTNVVKFEVQLYKTREEKYLL</b>  | <b>488</b> |
| AtSnRK1.2      | -----                                                               |            |
| AtSnRK1.3      | CRWVRSFAYYKN-----HTIEDECAIILPTVIKFEIQLYKVREGKYLL                    | 468        |
| AtSnRK2.1      | -----                                                               |            |
| AtSnRK2.2      | -----                                                               |            |
| AtSnRK2.3      | -----                                                               |            |
| AtSnRK3.1      | -----                                                               |            |
| AtSnRK3.2      | EKEKEEQLLQDEQGEQEPS-----                                            | 456        |
| AtSnRK3.3      | -----                                                               |            |
| :              |                                                                     |            |
| AtSnRK1.1      | DLQRVQGPQFLFLDLCAAFLAQLRVL                                          | 535        |
| <b>SISnRK1</b> | <b>DLQRVQGPQFLFLDLCAAFLAQLRVL</b>                                   | <b>514</b> |
| AtSnRK1.2      | -----                                                               |            |
| AtSnRK1.3      | DILRIDGPQFIFDLCAVFLRELGVL                                           | 494        |
| AtSnRK2.1      | -----                                                               |            |
| AtSnRK2.2      | -----                                                               |            |
| AtSnRK2.3      | -----                                                               |            |
| AtSnRK3.1      | -----                                                               |            |
| AtSnRK3.2      | -----                                                               |            |
| AtSnRK3.3      | -----                                                               |            |

**Supplemental Figure S1.** Alignment of SnRK proteins from tomato and *Arabidopsis*. The following SnRK sequences were aligned using clustalW: SISnRK1 (shown in bold; AF143743), AtSnRK1.1 (NP850488), AtSnRK1.2 (NP974375), AtSnRK1.3 (NP198760), AtSnRK2.1 (P43292), AtSnRK2.2 (Q39192), AtSnRK2.3 (Q39193), AtSnRK3.1 (P92937), AtSnRK3.2 (Q9LYQ8), AtSnRK3.3 (Q9SUL7). The invariant lysine responsible for ATP binding is shown in yellow outlined in black; K48 in SISnRK1. The activation phosphorylation site, T175 in SISnRK1, is shown in red outlined in black.

# Supplemental Figure S2 contd.

Avila et al.

|                |                                                              |                                                                      |                                    |                            |                         |     |
|----------------|--------------------------------------------------------------|----------------------------------------------------------------------|------------------------------------|----------------------------|-------------------------|-----|
| AtAKINβ1       | MGNANGKDEDAAGSGGADVTSSSAR                                    | <b>S</b> NGGDPSARSRH----                                             | RRPSSDSMSSSPPGSPAR                 | 56                         |                         |     |
| <b>SlGal83</b> | <b>MGNANAR-EDGAAGDGDG</b>                                    | <b>D</b> GQVSGRR <b>S</b> NVE <b>S</b> GIVEDHHALNSRVPSADLMVNSPPQSPHR |                                    | 59                         |                         |     |
| <b>SlSip1</b>  | <b>MGNVNGREENEGNI</b>                                        | <b>P</b> SGVEGVG--IDSGGVQDIMAVHQ----                                 | VDGEFMGQSPSSPRA                    | 53                         |                         |     |
| <b>SlTau2</b>  | <b>MGNVNGREE</b>                                             | -----ID-- <b>Q</b> <b>S</b> SVGIQETMDAR-----                         | DGEFMGQSPSSPRA                     | 39                         |                         |     |
| AtAKINβ2       | MGNVNAREEANSNNASAVEDED----                                   | AEICSRREAMSAASDGNHVAPPELMGQSPPHSPRA                                  |                                    | 56                         |                         |     |
| <b>SlTau1</b>  | <b>MGNVSGKKKEGESAE</b>                                       | <b>S</b> SGIKNQ----- <b>E</b> HGEEYMEYG-----                         | LFPDSMVQSPPHSPKA                   | 49                         |                         |     |
| HsAMPKβ1       | MGNTSSERAALERHGGHKTPRR-----                                  |                                                                      | <b>D</b> <b>S</b> GGTKDGRPK        | 35                         |                         |     |
| HsAMPKβ2       | MGNTTSDRVSGERHG-AKAARS-----                                  |                                                                      | EGAGGHAPGKEHK                      | 34                         |                         |     |
|                | ***...                                                       | :                                                                    | :                                  |                            |                         |     |
| AtAKINβ1       | -SPSPFLFAPQVPVAPLQORANAPPNNIQW-NQS-QRVFDNPP-EQGIPTIITWNQGGND |                                                                      |                                    | 112                        |                         |     |
| <b>SlGal83</b> | <b>-SASPLLF</b>                                              | <b>G</b> QVPVPLQGGDGNPVSNQMWGNEC-EDASDHSL-EGGIPTLITWSYGGNN           |                                    | 116                        |                         |     |
| <b>SlSip1</b>  | <b>-SRSPL</b>                                                | <b>M</b> FRPEMPVPLQRPDEGHGPSISWSQT--TSGYEPCDEQGVPTLISWTLDGKE         |                                    | 110                        |                         |     |
| <b>SlTau2</b>  | <b>-SHSPLM</b>                                               | <b>F</b> RQMPVPLQRPPEELHISNPSWMQN--TSGYEDLNEEKGVPTLISWTYEGKD         |                                    | 96                         |                         |     |
| AtAKINβ2       | -TQSPLMFAPQVPVPLQRPDEIHIPNPSWMQSP-SSLYEEASNEQGIPTMITWCHGGKE  |                                                                      |                                    | 114                        |                         |     |
| <b>SlTau1</b>  | <b>YHHSPLD</b>                                               | <b>F</b> TPQVPIFPLQRPDEILMQNQSGNIVQKTMEYGDMPCENGIPTMITWSHGGHE        |                                    | 109                        |                         |     |
| HsAMPKβ1       | -----ILMDSPEADLDFHSEEIKAPEKEEF                               | FLAWQHDLEVNDKAPAQARPTVFRWTGGGKE                                      |                                    | 90                         |                         |     |
| HsAMPKβ2       | -----IMVGSTDDPSVFS                                           | LPDSKLPGDKEFVSWQQDLEDSVKPTQQARPTVIRWSEGGKE                           |                                    | 89                         |                         |     |
|                | : . . . . .                                                  | :                                                                    | :                                  |                            |                         |     |
| AtAKINβ1       | VAVEGSWDNWRSRKKLQK                                           | <b>S</b> GKDHSILFVLPSGIYHYKVI                                        | VDGESKYIPDLPFVADEVGNV              | 172                        |                         |     |
| <b>SlGal83</b> | <b>VAIQGS</b>                                                | <b>W</b> DNWTSRKILQK <b>S</b> GKDYTVLLVLP                            | SGIYHYKFIVDGEVRYIPELPCVADETVV      | 176                        |                         |     |
| <b>SlSip1</b>  | <b>VAVEGS</b>                                                | <b>W</b> DNWKSRLMPLQK <b>S</b> GKDFITLKVLP                           | SGVYQYRFIVDQWRCSPDLPCVQDEAGNT      | 170                        |                         |     |
| <b>SlTau2</b>  | <b>IAVEGS</b>                                                | <b>W</b> DNWKSRLMPLQK <b>S</b> GKDFITLKVLP                           | SGVYQYRFIVDQWRCSPDLPCVQDEAGNT      | 156                        |                         |     |
| AtAKINβ2       | IAVEGSWDNWKTRSRQLQK                                          | <b>S</b> GKDFITMKNVLP                                                | SGVYQYRFIVDQWRHAPPELPLARDDAGNT     | 174                        |                         |     |
| <b>SlTau1</b>  | <b>VAIEGS</b>                                                | <b>W</b> DGKTKDFLQK <b>S</b> GKDFITVMKVF                             | PSGVYHYRFIVDQWRYAPDYPYERDDTGNV     | 169                        |                         |     |
| HsAMPKβ1       | VYLSGSFNNWS-KLPLTR                                           | <b>S</b> HNNFVAI                                                     | LDLPEGEHQYKFFVDGQWTHDPSEPIVTSQLGTV | 149                        |                         |     |
| HsAMPKβ2       | VFISGSFNNWSTKIPLIK                                           | <b>S</b> HNDFVAI                                                     | LDLPEGEHQYKFFVDGQWVHDPSEPVVTSQLGTI | 149                        |                         |     |
|                | : . : . : .                                                  | :                                                                    | :                                  |                            |                         |     |
| AtAKINβ1       | CNILDVHNFVNPENPESIVEFEA-----                                 | PP                                                                   | SPDHSYGQTLPAA--EDYAKEPLAVP         | 220                        |                         |     |
| <b>SlGal83</b> | <b>FNLLDV</b>                                                | <b>N</b> DPENLESVAEFEA-----                                          | PP                                 | SPDSSYAQALMGE--EDFEKEPVAVP | 224                     |     |
| <b>SlSip1</b>  | <b>YNLLDM</b>                                                | <b>K</b> DYVPEDIESISGFEP-----                                        | PQ                                 | SPDSSYNNLHLVS--EDYAKEPPVVP | 218                     |     |
| <b>SlTau2</b>  | <b>YNILDV</b>                                                | <b>K</b> DYVPEDIESISGFEP-----                                        | PL                                 | SPDSSYNLELGA--EDYAKEPPLVP  | 204                     |     |
| AtAKINβ2       | FNILDLDQDYVPEDIQISISGFEP-----                                | PQ                                                                   | SPENSYSNLLLGA--EDYSKEPPVVP         | 222                        |                         |     |
| <b>SlTau1</b>  | <b>FNVLDL</b>                                                | <b>Q</b> DI IPEVLNNTNWSDA-----                                       | PP                                 | SPESSYSNAPFSS--EDFSEKLPDLP | 217                     |     |
| HsAMPKβ1       | NNIIQVKKTD                                                   | FEVFDALMVDSQKCS                                                      | DVS--ELSS                          | PPGPYHQEPYVCKPEERFRAPPILP  | 207                     |     |
| HsAMPKβ2       | NNLIHVKKSD                                                   | FEVFDALKLDSMESSE                                                     | TS                                 | CRDLSS                     | PPGPYQEMYAFRSEERFKSPILP | 209 |
|                | * : : : .                                                    | :                                                                    | :                                  |                            |                         |     |
| AtAKINβ1       | PQLHLTLLG--TTEETA---                                         | IATKPQHVVNLNHVFIEQGWTPQSIVALGLTHR                                    | FESKYITV                           | 275                        |                         |     |
| <b>SlGal83</b> | <b>PQLHLT</b>                                                | <b>V</b> LGSENSEAP---SSPKQHVVNLNHLFIEK                               | GWASQSIVALGLTHR                    | FQSKYVTV                   | 281                     |     |
| <b>SlSip1</b>  | <b>PHLQMT</b>                                                | <b>L</b> LNVPSPHMEI-PPPLSRPQHVVNLNHL                                 | YMQKDRSTPSVVALGSTNRFLSKYVTV        | 277                        |                         |     |
| <b>SlTau2</b>  | <b>PHLQMT</b>                                                | <b>L</b> LNVPSSPMEILPPPLSRPQHVVNLNHL                                 | YMQKGSNPSLVALSSTNRFLFKYVTV         | 264                        |                         |     |
| AtAKINβ2       | PHLQMTLLNLPANPDI-PSPLPRPQH                                   | VVNLNHL                                                              | YMQKGSVVALGSTRFLAKYVTV             | 281                        |                         |     |
| <b>SlTau1</b>  | <b>PLLQOT</b>                                                | <b>P</b> LDQSSSAGS-VETFRKPLPAVLNHL                                   | YIQKTRSSQSMVLSSTHRFRTKYVTA         | 276                        |                         |     |
| HsAMPKβ1       | PHLLQVILNKDTGISCD-PALLPEPNH                                  | VMLNHL                                                               | YALS--IKDGMVLSATHRYKKKYVTT         | 264                        |                         |     |
| HsAMPKβ2       | PHLLQVILNKDTNISCD-PALLPEPNH                                  | VMLNHL                                                               | YALS--IKDSVMVLSATHRYKKKYVTT        | 266                        |                         |     |
|                | * * . *                                                      | :                                                                    | :                                  |                            |                         |     |
| AtAKINβ1       | VLYKPLTR                                                     |                                                                      |                                    | 283                        |                         |     |
| <b>SlGal83</b> | <b>VLYKPLKR</b>                                              |                                                                      |                                    | 289                        |                         |     |
| <b>SlSip1</b>  | <b>VLYKSIQS</b>                                              |                                                                      |                                    | 285                        |                         |     |
| <b>SlTau2</b>  | <b>VLYKSIQR</b>                                              |                                                                      |                                    | 272                        |                         |     |
| AtAKINβ2       | VLYKSLQR                                                     |                                                                      |                                    | 289                        |                         |     |
| <b>SlTau1</b>  | <b>VLFKSLKK</b>                                              |                                                                      |                                    | 284                        |                         |     |
| HsAMPKβ1       | LLYKPI--                                                     |                                                                      |                                    | 270                        |                         |     |
| HsAMPKβ2       | LLYKPI--                                                     |                                                                      |                                    | 272                        |                         |     |
|                | : * : * . :                                                  | :                                                                    | :                                  |                            |                         |     |

**Supplemental Figure S2.** Alignment of SnRK complex β-subunits. The following β-subunit protein sequences were aligned using clustalW: SlGal83 (JF895513), SlSip1 (JF8955212), SlTau1 (XXXX), SlTau2 (XXXX), AtAKINβ1 (AAM6584), AtAKINβ2 (CAB64719), HsAMPKβ1 (NP\_006244), and HsAMPKβ2 (NP\_005390). The N-terminal end of the original SlGal83 (D18) is shown in purple and outlined in black. The Adi3 phosphorylation site on SlGal83 (S26) and the MS identified phosphorylation site S30 are shown in red outlined in black. The originally identified SlSip1 start site (M33) is shown in orange outlined in black. The HsAMPKβ1 phosphorylation sites are shown in pink outlined in black.

# Supplemental Figure S3

Avila et al.

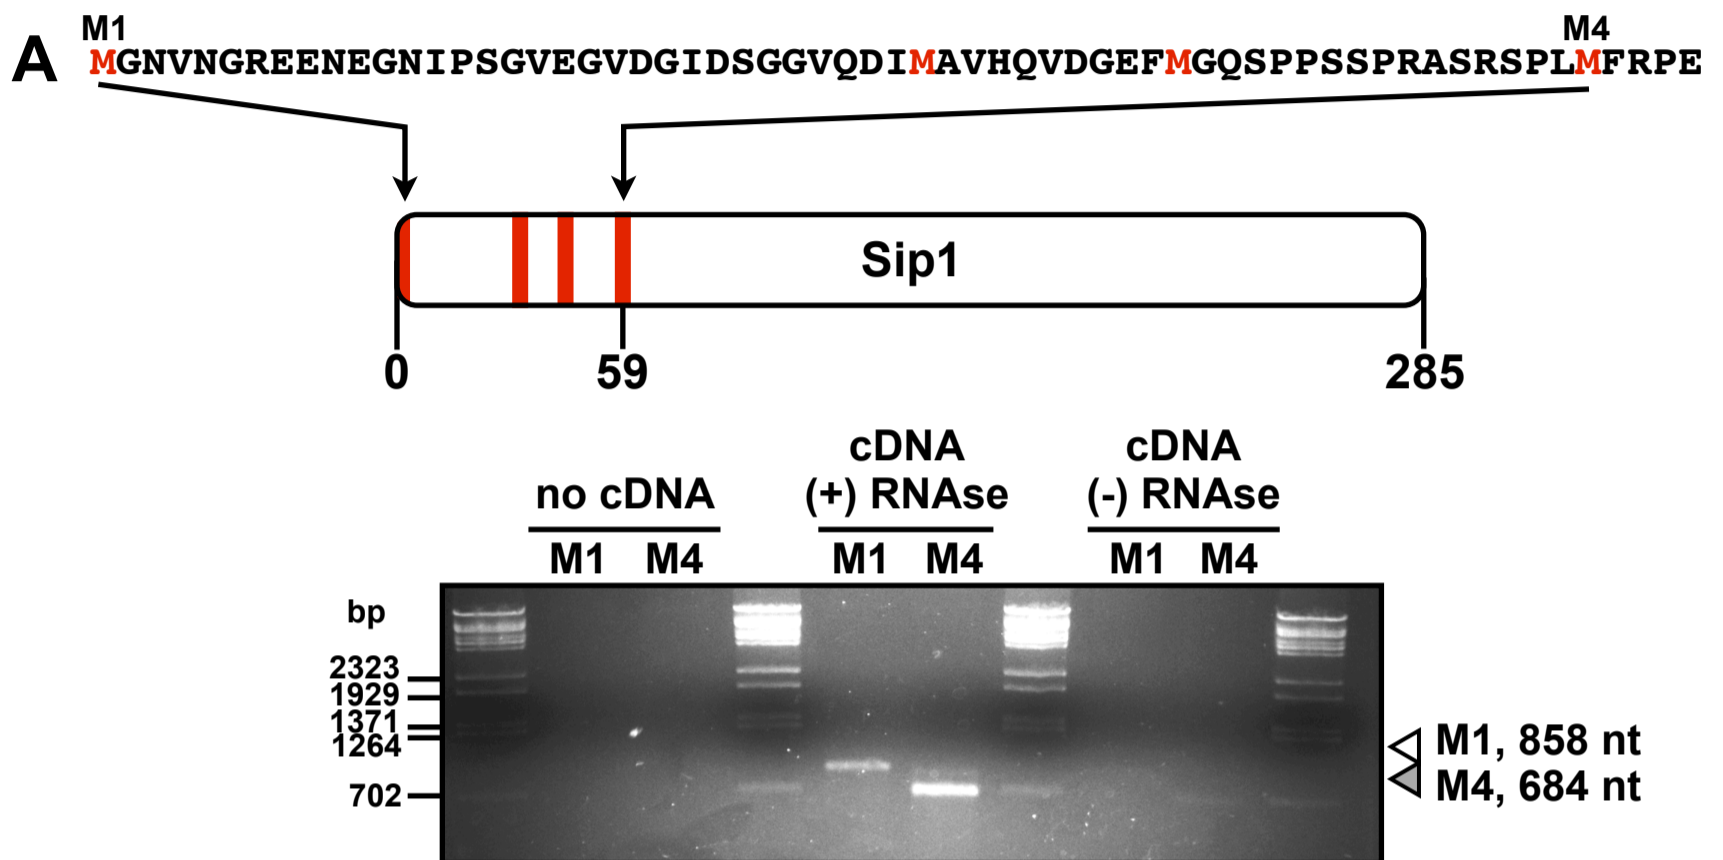

## B

| Bait   | Prey   |
|--------|--------|
| Adi3   | pJG4-5 |
| pEG202 | GAL83  |
| Adi3   | BICOID |
| Dorsal | GAL83  |
| Adi3   | GAL83  |

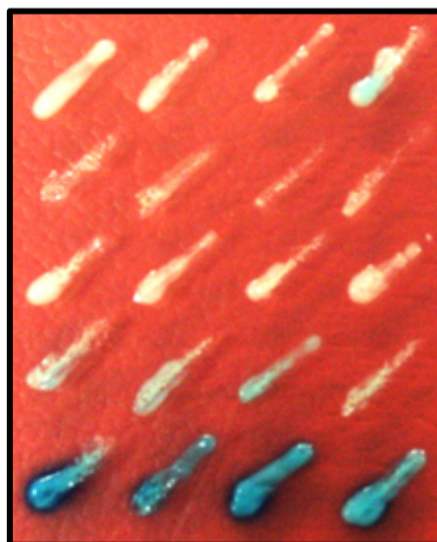

**Supplemental Figure S3.** RT-PCR amplification of S1Sip1 and Adi3/S1Gal83 yeast two-hybrid interaction. A, Schematic of S1Sip1 showing originally identified start site (M4) and newly identified start site (M1). Also shown below is the RT-PCR gel showing amplification of the larger S1Sip1 from tomato leaf total RNA. B, Yeast two-hybrid interaction between Adi3 and Gal83. The indicated bait and prey constructs were tested in a standard yeast two-hybrid assay for expression of the *lacZ* gene on X-Gal plates.

# Supplemental Figure S4

Avila et al.

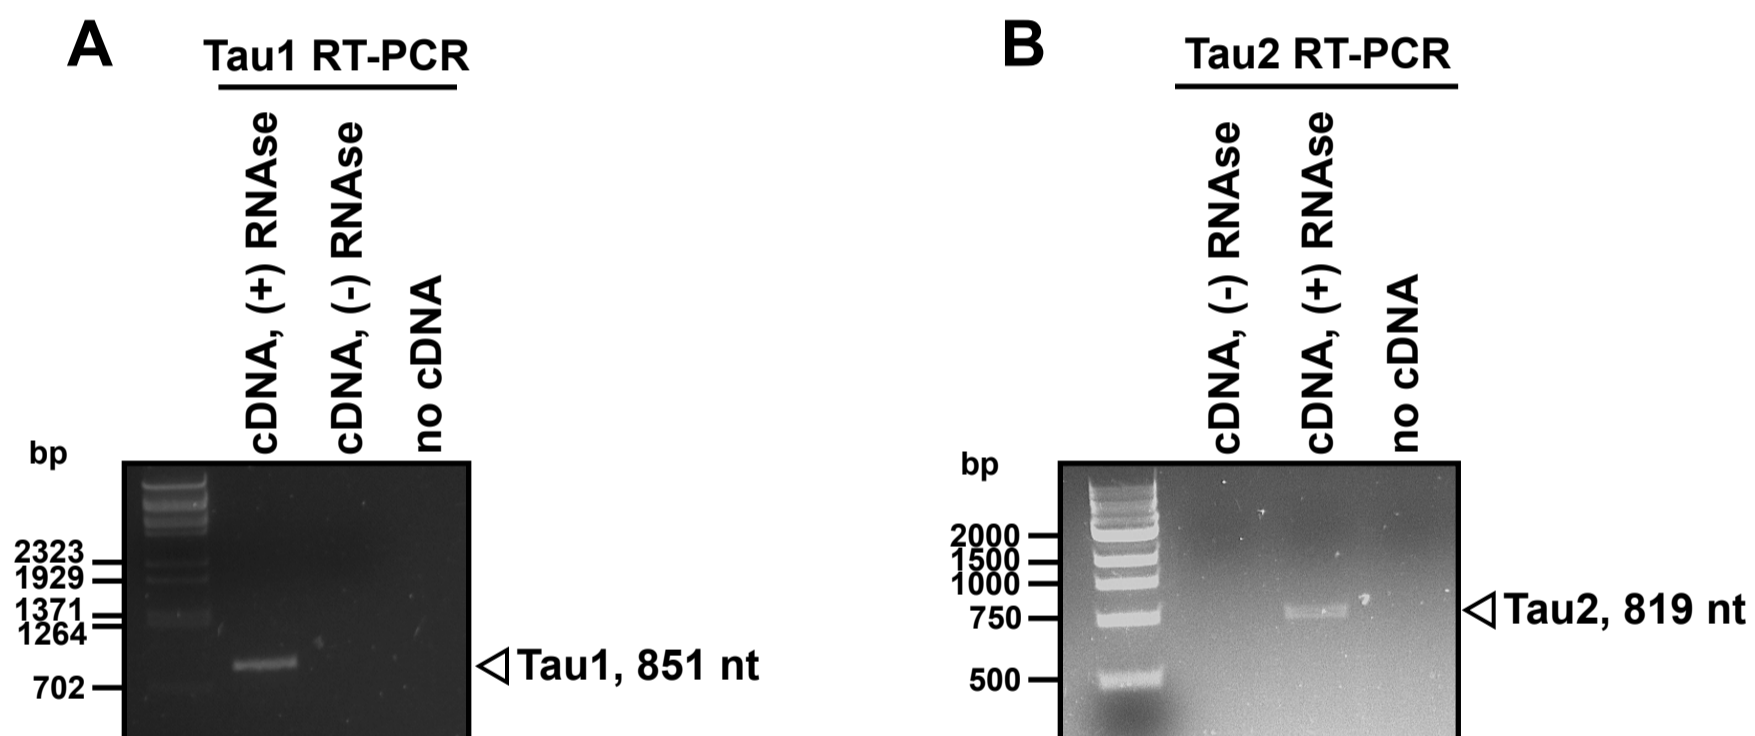

**Supplemental Figure S4.** RT-PCR amplification of S1Tau1 and S1Tau2. A, RT-PCR gel showing amplification of the S1Tau1 cDNA from tomato leaf total RNA. B, RT-PCR gel showing amplification of the S1Tau2 cDNA from tomato leaf total RNA.

# Supplemental Figure S5

Avila et al.

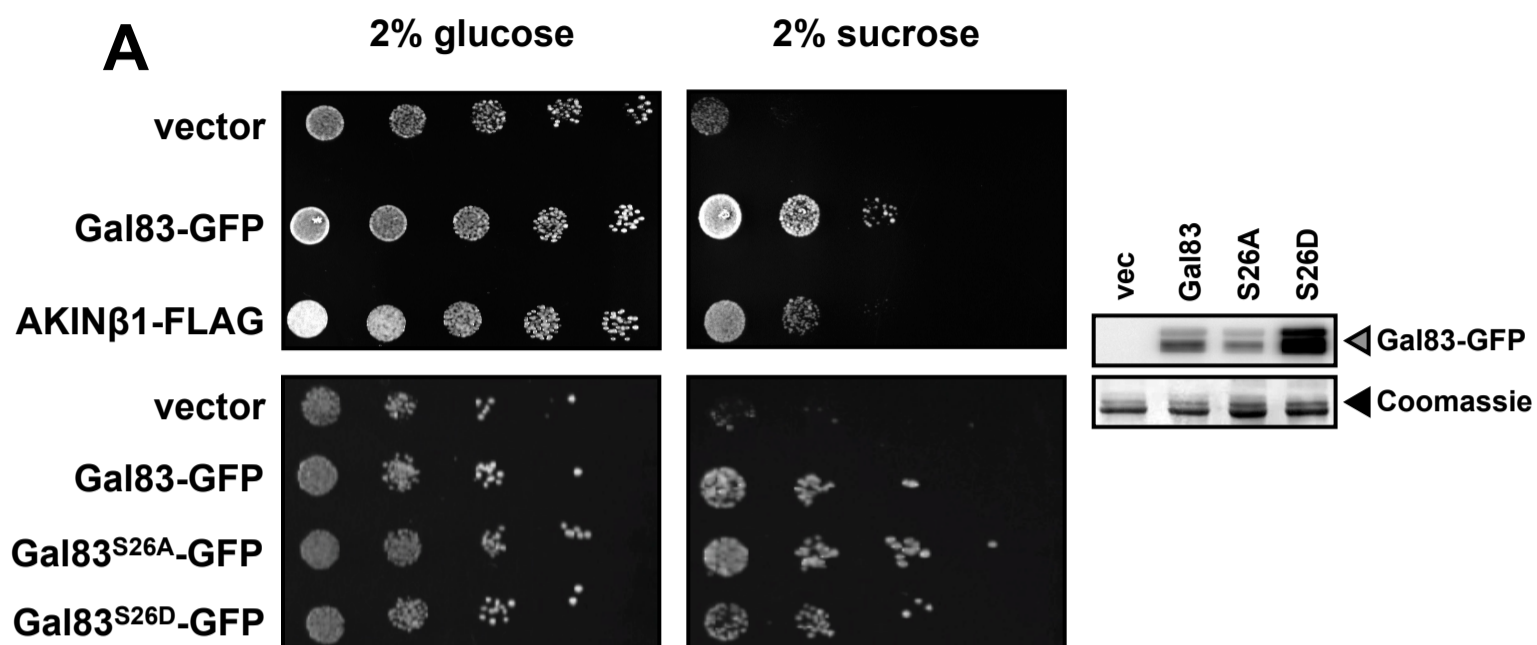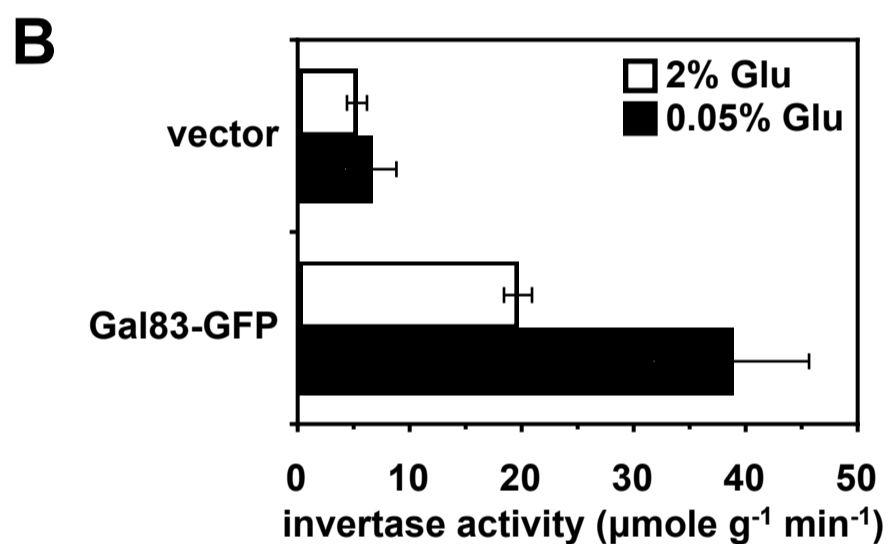

**Supplemental Figure S5.** SIGal83 complementation of *sip1 $\Delta$ sip2 $\Delta$ gal83 $\Delta$*  yeast. A, Tomato Gal83 can complement the yeast  $\beta$ -subunit triple knockout. *sip1 $\Delta$ sip2 $\Delta$ gal83 $\Delta$*  yeast cells were transformed with empty vector, the indicated SIGal83 constructs, or AKIN $\beta$ 1 and plated on 2% glucose or sucrose CM plates at 5-fold dilutions. SIGal83-GFP protein expression detected by  $\alpha$ -GFP western blot is shown on the right. B, SIGal83 complementation of yeast invertase activity. The indicated constructs were transformed into *sip1 $\Delta$ sip2 $\Delta$ gal83 $\Delta$*  yeast and extracts from the yeast tested for invertase activity in the presence of high (2%) and low (0.05%) glucose. Values are averages of three independent experiments and error bars are standard error.

# Supplemental Figure S6

Avila et al.

**A**

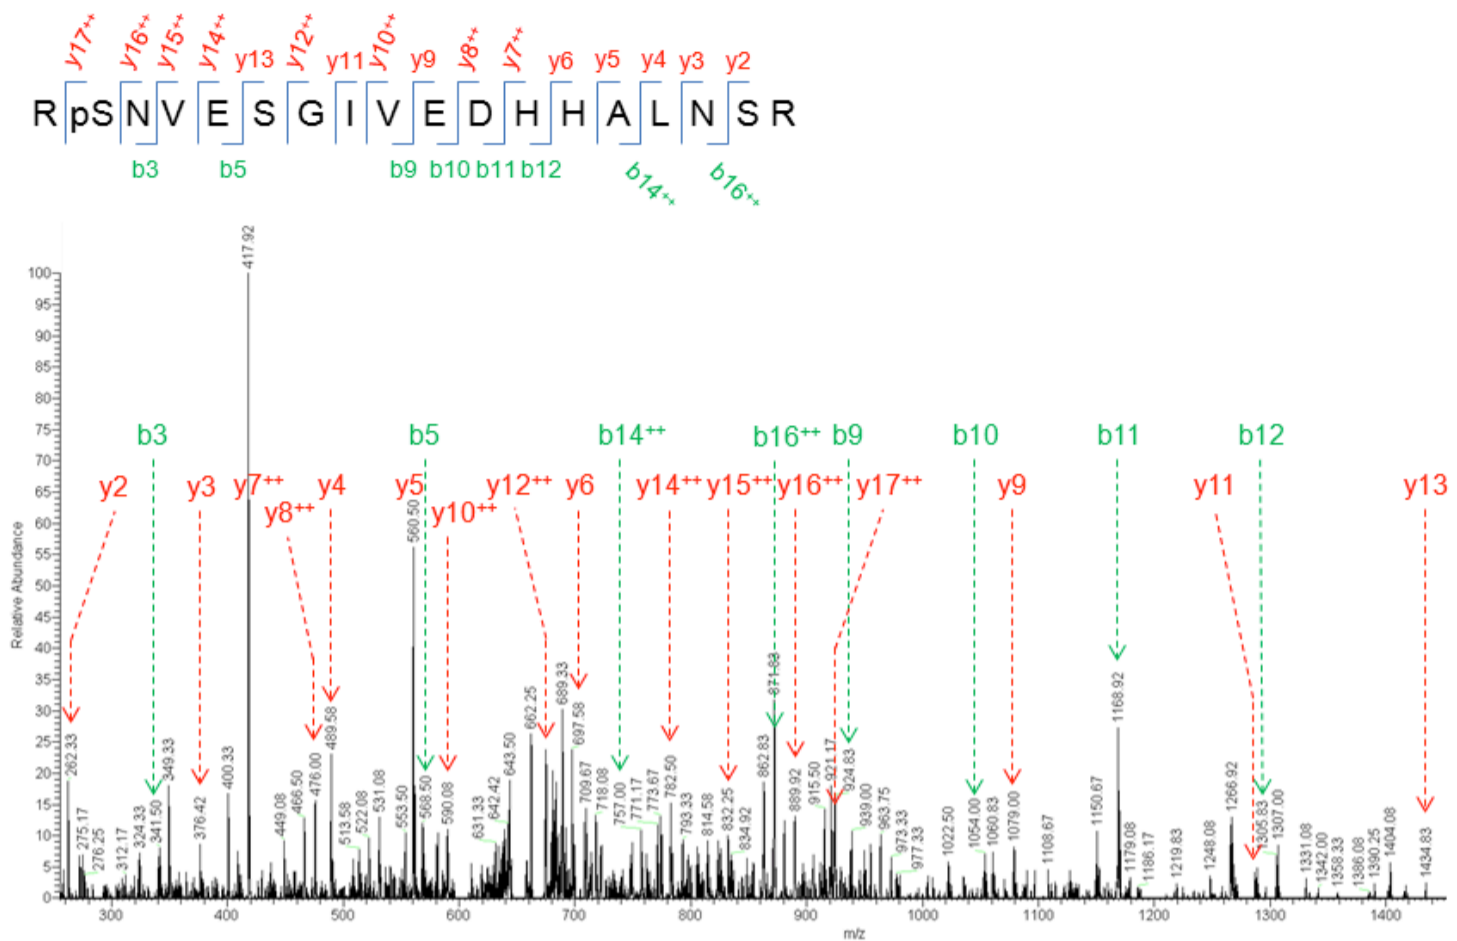

**B**

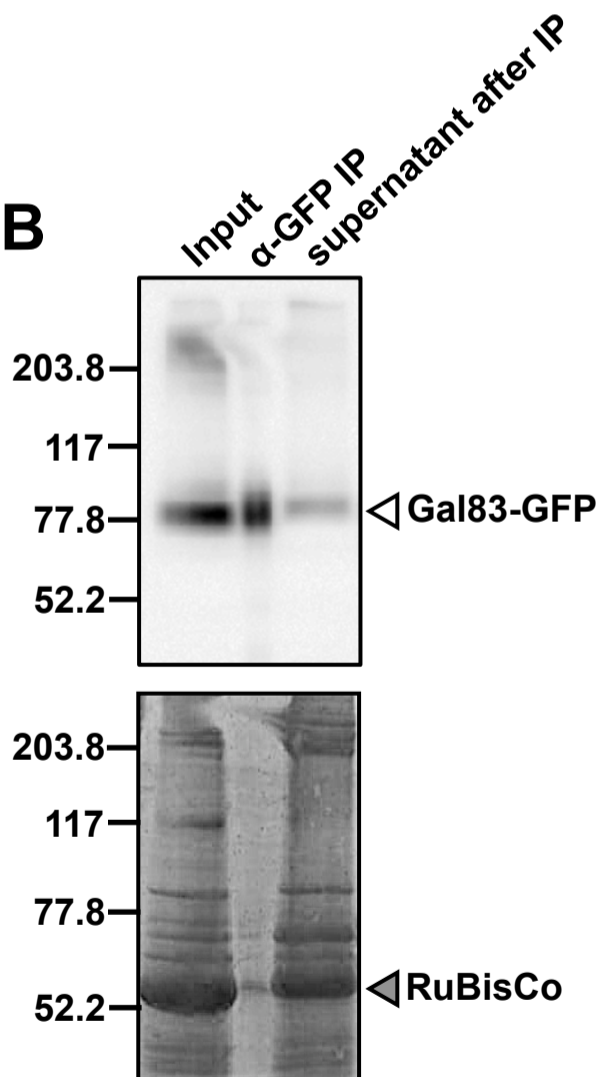

**C**

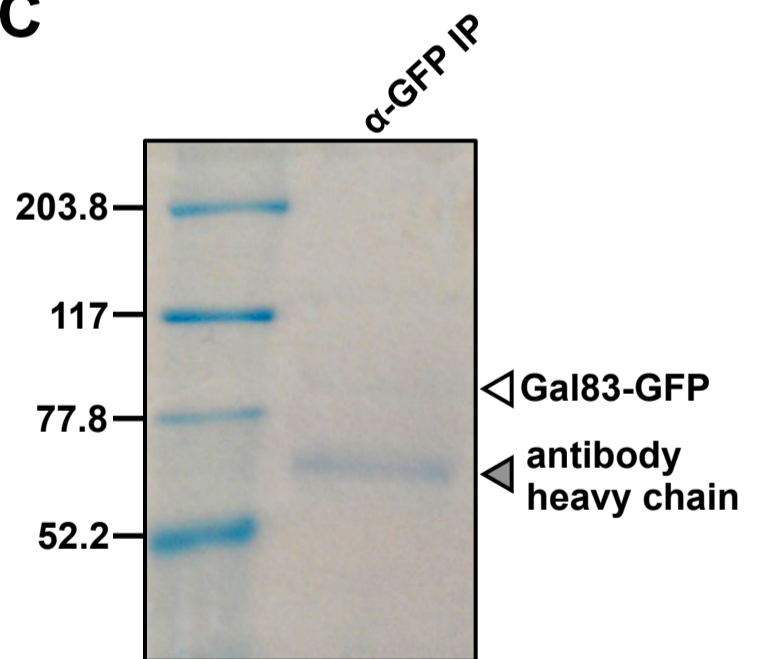

**Supplemental Figure S6.** MS identification of SIGal83 S26 phosphorylation and  $\alpha$ -GFP immunoprecipitation of SIGal83-GFP. A, Identification of SIGal83 S26 phosphorylation *in vitro* in peptide R p S N V E S G I V E D H H A L N S R. B, SIGal83-GFP can be pulled down with an  $\alpha$ -GFP antibody. Protoplasts expressing SIGal83-GFP for 16 hrs were lysed, immunoprecipitated with  $\alpha$ -GFP antibody, and analyzed by  $\alpha$ -GFP western blot. C, Immunoprecipitated SIGal83-GFP used for MS analysis. SIGal83-GFP was expressed and immunoprecipitated as in (A) and the sample separated by SDS-PAGE. The band corresponding to SIGal83-GFP was cut from the gel, trypsin digested and analyzed by MS.

# Supplemental Figure S7

Avila et al.

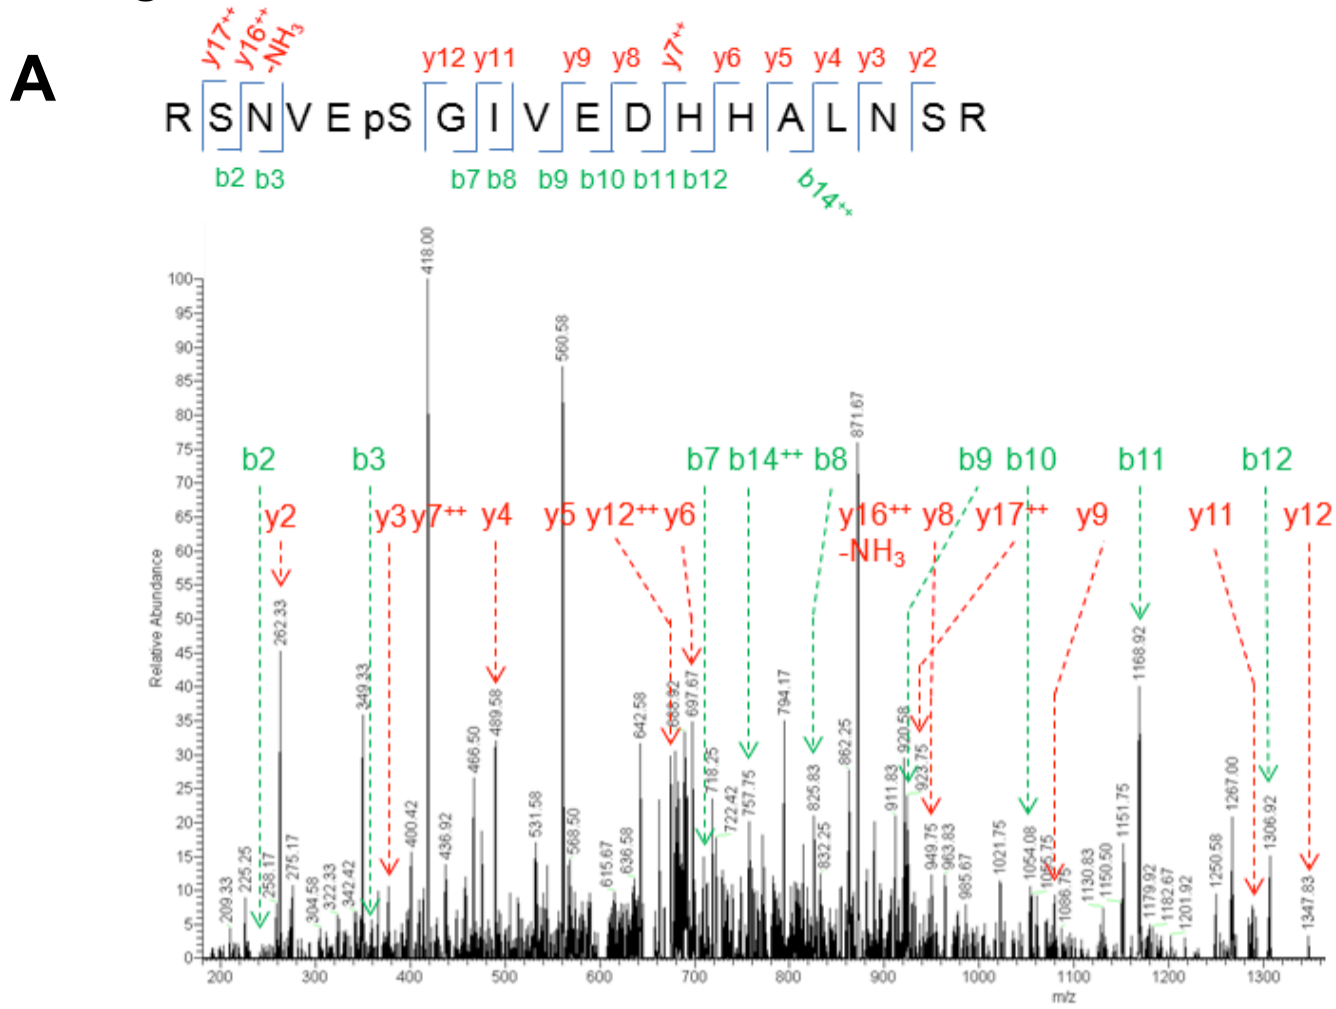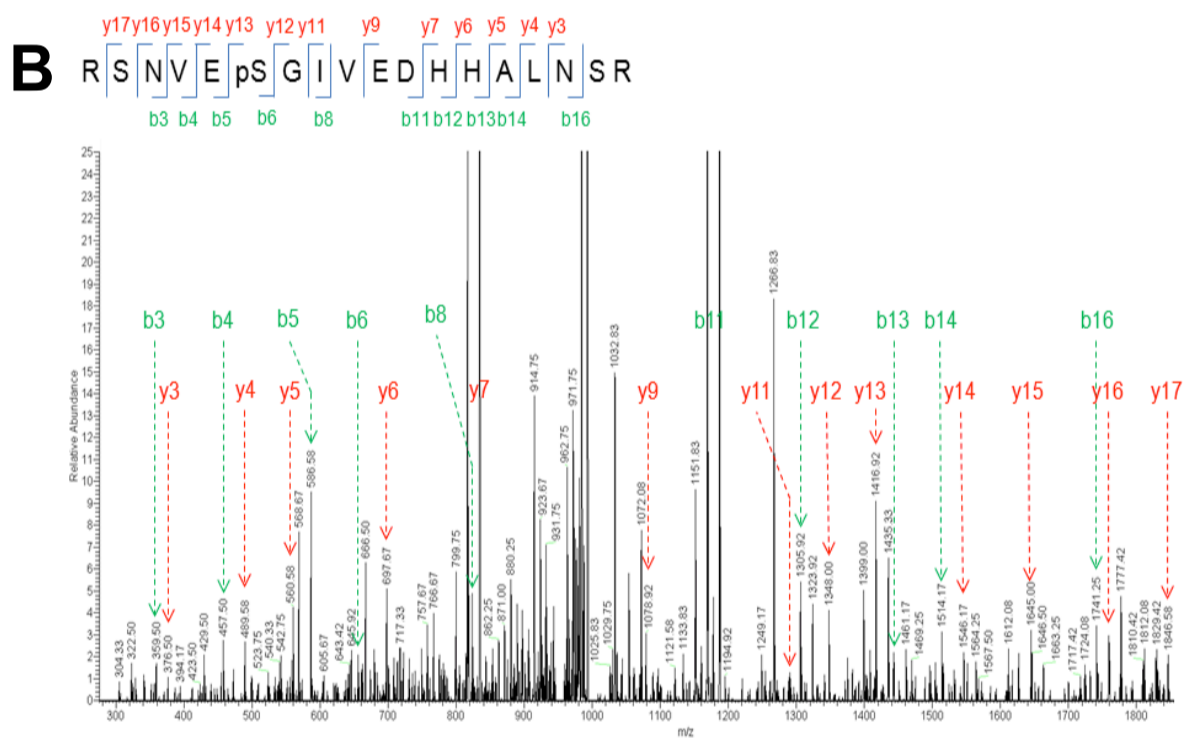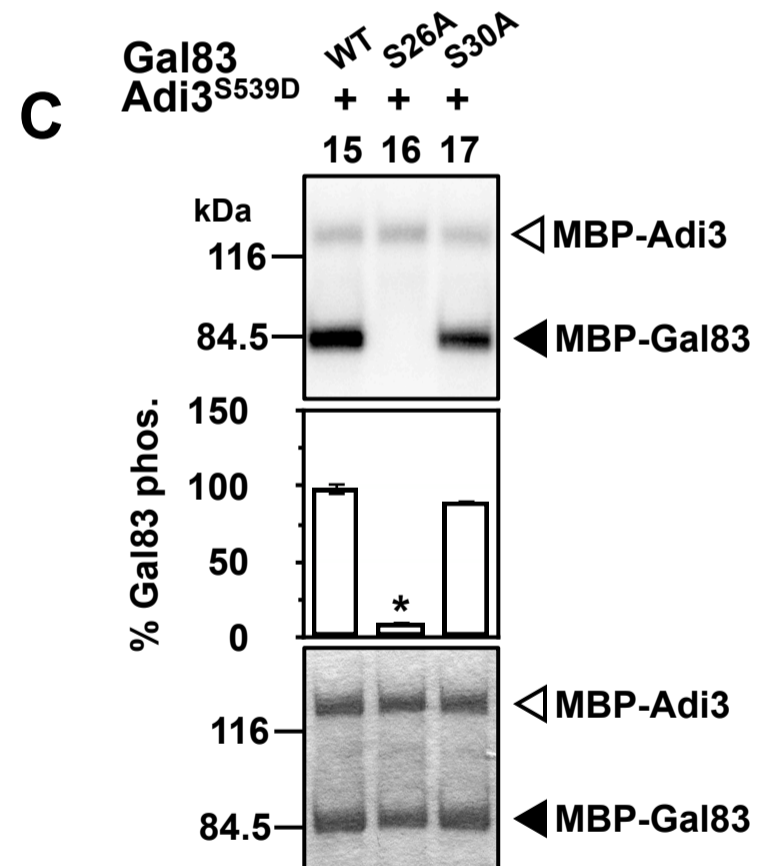

**Supplemental Figure S7.** MS identification of S1Gal83 S30 phosphorylation. A, Identification of S1Gal83 S30 phosphorylation *in vitro* in peptide RSNVEpSGIVEDHHALNSR. B, Identification of S1Gal83 S30 phosphorylation *in vivo* in peptide RSNVEpSGIVEDHHALNSR. C, Adi3 does not phosphorylate S1Gal83 S30 *in vitro*. One asterisk indicates significant decrease in phosphorylation of S1Gal83 Ser to Ala mutants compared to wild-type S1Gal83 phosphorylation (Student's *t* test,  $p < 0.05$ ).



# Supplemental Figure S8

Avila et al.

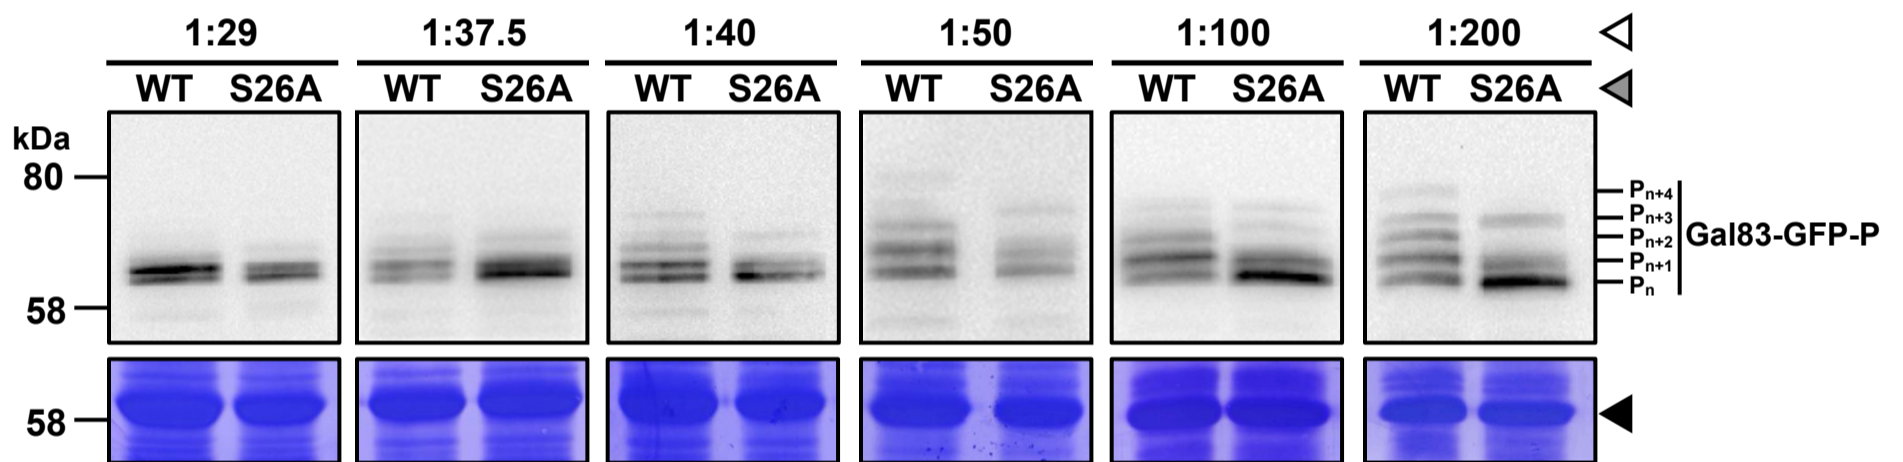

**Supplemental Figure S8.** Separation of SI Gal83-GFP phosphoproteins by SDS-PAGE with varying bis-acrylamide:acrylamide ratios. SI Gal83-GFP was stably transformed into *Arabidopsis*, protein extracts made from leaf tissue, and the extracts analyzed by SDS-PAGE. Open triangle, bis-acrylamide:acrylamide ratio; grey triangle, SI Gal83-GFP protein; black triangle, RuBisCo

# Supplemental Table S1

Avila et al.

| Gene  | Primer Name    | Puopose                                            | Direction | Restriction site | Sequence                                 |
|-------|----------------|----------------------------------------------------|-----------|------------------|------------------------------------------|
| Adi3  | Adi3 BamHI-F   | Cloning into pGEX                                  | Forward   | BamHI            | CACGGATCCATGGAAAGGATACCTGAAGTT           |
| Adi3  | Adi3 EcoRI-R   | Cloning into pGEX                                  | Reverse   | EcoRI            | CACGAATTCCTAAAAGAAGTCAAAGTCAAG           |
| SnRK1 | SnRK EcoRI-F   | ORF Amplification<br>Cloning into pEG202/pJG4-5    | Forward   | EcoRI            | CACGAATTCATGGACGGAACAGCAGTG              |
| SnRK1 | SnRK BamHI-R   | ORF Amplification<br>Cloning into pEG202           | Reverse   | BamHI            | CACGGATCCCTTAAAGTACTCGAAGCTG             |
| SnRK1 | SnRK PstIR     | Cloning into pMAL                                  | Reverse   | PstI             | CACCTGCAGTTAAAGTACTCGAAGCTG              |
| SnRK1 | SnRK T175D-F   | Mutagenesis                                        | Forward   |                  | GGTCATTTTCTGAAGGATAGTTGCGGAAGCCCA        |
| SnRK1 | SnRK T175D-R   | Mutagenesis                                        | Reverse   |                  | TGGGCTTCCGCAACTATCCTTCAGAAAATGACC        |
| SnRK1 | SnRK K48Q-F    | Mutagenesis                                        | Forward   |                  | CACAAAGTTGCTGTCCAGATTCTTAATCGTCGA        |
| SnRK1 | SnRK K48Q-R    | Mutagenesis                                        | Reverse   |                  | TCGACGATTAAGAATCTGGACAGCAACTTTGTG        |
| Snf4  | Snf4 EcoRI     | ORF Amplification<br>Cloning into                  | Forward   | EcoRI            | CACGAATTCATGCAGGCAACAGCGGAG              |
| Snf4  | Snf4 Sall      | ORF Amplification<br>Cloning into                  | Reverse   | Sall             | CACGTCGACTCACTGCAAAAACTCAG               |
| Sip1  | Sip1 EcoRI     | ORF Amplification<br>Cloning into pMAL             | Forward   | EcoRI            | CACGAATTCATGTTTAGACCTGAGATG              |
| Sip1  | Sip1 BamHI     | ORF Amplification<br>Cloning into pMAL             | Reverse   | BamHI            | CACCTCGAGTCACCTCTGTATTGACTTG             |
| Gal83 | Gal83 EcoRI    | ORF Amplification<br>Cloning into pMAL,            | Forward   | EcoRI            | CACGAATTCATGGGGAATGCGAACGCC              |
| Gal83 | Gal83 SallR    | ORF Amplification<br>Cloning into                  | Reverse   | Sall             | CACGTCGACTCACCTCTTCAGTGGCTTG             |
| Gal83 | Gal83 BamHI    | Cloning into MBB263, pTEX<br>cGFP                  | Forward   | BamHI            | CACGGATCCATGGGGAATGCGAACGCC              |
| GFP   | GFP EcoRI      | Cloning of Gal83-GFP into<br>MBB263                | Reverse   | EcoRI            | CACGAATTCCTATTGTATAGTTCATCC              |
| Gal83 | Gal83 SallR NS | Cloning Gal83 without stop<br>codon into pTEX cGFP | Reverse   | Sall             | CACGTCGACCCTCTTCAGTGGCTTGGTAG            |
| Gal83 | S22A           | Mutagenesis                                        | Forward   |                  | GGCGACGGT CAGGTAGCGGGAAGAAGA TCTAATG     |
| Gal83 | S22A           | Mutagenesis                                        | Reverse   |                  | CATTAGATCTTCTCCCGCTACCTGACCGTCGCC        |
| Gal83 | S26A           | Mutagenesis                                        | Forward   |                  | CGGGAAGAAGAGCTAATGTTGAATCTGG             |
| Gal83 | S26A           | Mutagenesis                                        | Reverse   |                  | CCAGATTCAACATTAGCTCTTCTTCCG              |
| Gal83 | S45A           | Mutagenesis                                        | Forward   |                  | CGCGAGTGCCTGCGGCTGACTTGATGG              |
| Gal83 | S45A           | Mutagenesis                                        | Reverse   |                  | CCATCAAGTCAGCCGCGAGGCACTCGCG             |
| Gal83 | S60/62A        | Mutagenesis                                        | Forward   |                  | GCAGAGTCCACATCGTGCAGCTGCACCTCTCTTGTTCGG  |
| Gal83 | S60/62A        | Mutagenesis                                        | Reverse   |                  | CCGAACAAGAGAGGTTGCAGCTGCACAGTGTGGACTCTGC |
| Gal83 | S122A          | Mutagenesis                                        | Forward   |                  | GTTGCTATCCAAGGAGCTTGGGACAACCTGGAC        |
| Gal83 | S122A          | Mutagenesis                                        | Reverse   |                  | GTCCAGTTGTCCCAAGCTCCTTGGATAGCAAC         |
| Gal83 | S135A F        | Mutagenesis                                        | Forward   |                  | GGAAAATTCTCCAAAGAGCAGGCAAGGACTATACCG     |
| Gal83 | S135A R        | Mutagenesis                                        | Reverse   |                  | CGGTATAGTCTTGCCAGCTCTTTGGAGAATTTCC       |
| Gal83 | S147A          | Mutagenesis                                        | Forward   |                  | CTTTTGGTCTTCCAGCGGGTATATATCATTAC         |
| Gal83 | S147A          | Mutagenesis                                        | Reverse   |                  | GTAATGATATATACCCTGCTGGAAGGACCAAAAAG      |
| Gal83 | S192A          | Mutagenesis                                        | Forward   |                  | CCAGAGAACCTCGAAGCTGTTGCAGAGTTTGAG        |
| Gal83 | S192A          | Mutagenesis                                        | Reverse   |                  | CTCAAACCTGCAACAGCTTCGAGGTTCTCTGG         |
| Gal83 | S204/205A      | Mutagenesis                                        | Forward   |                  | CCACCATCACCTGACGCTGCCTATGCGCAAGCTTTG     |
| Gal83 | S204/205A      | Mutagenesis                                        | Reverse   |                  | CAAAGCTTGCGCATAGGCAAGCTCAGGTGATGGTGG     |
| Gal83 | S234A          | Mutagenesis                                        | Forward   |                  | CTAACTGTTCTTGGTGTGAAAACCTCAGAAGAAGC      |
| Gal83 | S234A          | Mutagenesis                                        | Reverse   |                  | GCTTCTTCTGAGTTTGTAGCACCAGAAGACAGTTAG     |
| Gal83 | S237A          | Mutagenesis                                        | Forward   |                  | GGTCTGAAAACGCAAGAAGAA GCACCTTC           |
| Gal83 | S237A          | Mutagenesis                                        | Reverse   |                  | GAAGGTGCTTC TTCTGCGTTTTC AGAACC          |
| Gal83 | S242/243A      | Mutagenesis                                        | Forward   |                  | CAGAAGAAGCACCTGCTGCT CCAAAACCCAGCACG     |
| Gal83 | S242/243A      | Mutagenesis                                        | Reverse   |                  | GTGCTGGGGTTTTGGAGCAGCAGGTGCTTCTCTG       |
| Gal83 | S262A/S264R    | Mutagenesis                                        | Forward   |                  | GAGAAAGGATGGGCTGCTCAAGCCATTGTTGCTCTTG    |
| Gal83 | S262A/S264R    | Mutagenesis                                        | Reverse   |                  | CCAAGAGCAACAATCCGTTGAGCAGCCCATCCTTTCTC   |
| Tau1  | Tau1-F         | ORF amplification                                  | Forward   |                  | ATGGGGAATGTGAGTGGG                       |
| Tau1  | Tau1-R         | ORF amplification                                  | Reverse   |                  | TCACTTTTTCAAGGACTTAAAAAG                 |
| Tau1  | Tau1 EcoRI     | Cloning into pMAL                                  | Forward   | EcoRI            | CACGAATTCATGGGGAATGTGAGTGGG              |
| Tau1  | Tau1 Sall      | Cloning into pMAL                                  | Reverse   | Sall             | CACGTCGACTCACTTTTCAAGGACTTAAAAAG         |
| Tau2  | Tau2-F         | ORF amplification                                  | Forward   |                  | ATGGGGAATGTTAATGGAAGAG                   |
| Tau2  | Tau2-R         | ORF amplification                                  | Reverse   |                  | TCACTCTGTATGGACTTGTAAG                   |
| Tau2  | Tau2 EcoRI     | Cloning into pMAL                                  | Forward   | EcoRI            | CACGAATTCATGGGGAATGTTAATGGA              |
| Tau2  | Tau2 Sall      | Cloning into pMAL                                  | Reverse   | Sall             | CACGTCGACTCACCTCTGTATGGACTTGTA           |

**Supplemental Table S1.** Primers used in this study are listed by gene name and purpose. In the primer sequences restriction sites are underlined, start and stop codons are in bold, and mutation sites are in bold and underlined.
